# Supplementary material for: 6-OHDA-induced dopaminergic neurodegeneration in Caenorhabditis elegans is promoted by the engulfment pathway and inhibited by the transthyretin-related protein TTR-33
Source: PLoS Genet. 2018 Jan 18;14(1):e1007125. doi: 10.1371/journal.pgen.1007125 (PMC5773127; doi:10.1371/journal.pgen.1007125)
Supplement: S1 Table — Genes with expression patterns correlating to the ttr-33 expression pattern were predicted using SPELL [69]–The GO terms and the according genes are sorted by p-value. The number of genes that are associated with this GO term out of all genes with a similar expression pattern to ttr-33, and out of all genes in the genome, are shown in column ‘% Query’ and ‘% Genome’, respectively. Very specific processes that are associated with few genes in the genome are marked in blue. * Similar GO terms based on the same group of genes were merged. (XLSX) [file pgen.1007125.s013.xlsx]

## Sheet: GOterms_ttr-33_expression
GO Term	p-value	% Query	% Genome	Annotated genes
neuropeptide signaling pathway	5.21e-08	7 of 41	188 of 54514	NLP-31, FLP-9, FLP-21, FLP-24, NLP-15, NLP-27, FLP-22
(negative) regulation of metalloenzyme activity, (negative) regulation of membrane protein ectodomain proteolysis*	0.000273	2 of 41	2 of 54514	CRI-2, K07C11.3
single-multicellular organism process*	0.000379	16 of 41	5401 of 54514	FLP-24, F20A1.1, NAS-36, GRD-10, FLP-12, BEST-24, LET-522, CAL-2, SNET-1, TNC-2, RPS-20, Y73F4A.2, STA-2, T26C5.4, PTR-8, F40F12.7
(defense) response to fungus *	0.000953	3 of 41	32 of 54514	NLP-31, CNC-6, STA-2
multi-organism process	0.0151	7 of 41	1212 of 54514	NLP-31, FLP-21, F20A1.1, FLP-12, CNC-6, STA-2, C18E3.5
biological regulation	0.0196	23 of 41	14131 of 54514	NLP-31, FLP-9, FLP-21, FLP-24, W01B11.6, NLP-15, NLP-27, GRD-10, FLP-12, BEST-24, TTR-48, CRI-2, LET-522, H05L03.3, TTR-32, SNET-1, K07C11.3, RPS-20, STA-2, PTR-8, FLP-22, RIC-4, F40F12.7
locomotion	0.0328	8 of 41	1873 of 54514	NAS-36, NLP-15, GRD-10, BEST-24, LET-522, TTR-32, SNET-1, Y4C6B.2
